# Supplementary material for: Clinical predictors of pulmonary tuberculosis among South African adults with HIV
Source: PubMed Central journal article supplement (PMC8902614; doi:10.1016/j.eclinm.2022.101328), 2022-03-05
Supplement: mmc1.pdf [file mmc1.pdf]

**Supplement to:**

**Clinical predictors of pulmonary tuberculosis among South African adults with HIV**

Simon C. Mendelsohn, Andrew Fiore-Gartland, Denis Awany, Humphrey Mulenga, Stanley Kimbung Mbandi, Michèle Tameris, Gerhard Walzl, Kogieleum Naidoo, Gavin Churchyard, Thomas J. Scriba, Mark Hatherill, and the CORTIS-HR Study Team.

**Contents**

|                                 |           |
|---------------------------------|-----------|
| <b>The CORTIS-HR Study Team</b> | <b>2</b>  |
| <b>Supplementary Methods</b>    | <b>4</b>  |
| <b>Supplementary Figures</b>    | <b>6</b>  |
| <b>Supplementary Tables</b>     | <b>10</b> |
| <b>References</b>               | <b>16</b> |

## The CORTIS-HR Study Team

*Centre for the AIDS Programme of Research in South Africa (CAPRISA), and <sup>7</sup>MRC-CAPRISA HIV-TB Pathogenesis and Treatment Research Unit, Doris Duke Medical Research Institute, University of KwaZulu-Natal, Durban, South Africa.*

Bianca Bande  
Thilagavathy Chinappa  
Cara-mia Corris  
Thobelani Cwele  
Celaphiwe Dlamini  
Dhineshree Govender  
Goodness Gumede  
Zanele Gwamada  
Senzo Halti  
Zandile Jali  
Lungile Khanyile  
Jabu Maphanga  
Nonhle Maphanga  
Razia Hassan-Moosa  
Nompumelelo Ngcobo  
Gloria Ntanjana  
Nesri Padayatchi  
Dirhona Ramjit  
Thandiwe Shezi  
Chandrapharbha Singh  
Phindile Sing  
Philile Thembela  
Londiwe Zaca  
Mbali Zulu

*DST/NRF Centre of Excellence for Biomedical TB Research and SAMRC Centre for TB Research, Division of Molecular Biology and Human Genetics, Department of Biomedical Sciences, Faculty of Medicine and Health Sciences, Stellenbosch University, Cape Town, South Africa.*

Petri Ahlers  
Roslyn Beukes  
Maria Didloff  
Marika Flinn  
Bernadine Fransman  
Andriëtte Hiemstra  
Jaftha Kruger  
Stephanus T. Malherbe  
Onesisa Mpofu  
Mpho Mtlali  
Dorothy Solomons  
Kim Stanley  
Susanne Tönsing  
Khayaletu Toto  
Ayanda Tsamane

*South African Tuberculosis Vaccine Initiative, Institute of Infectious Disease and Molecular Medicine, Division of Immunology, Department of Pathology, University of Cape Town, South Africa.*

Charmaine Abrahams  
Hadn Africa  
Denis Arendsen  
Nomfuneko Cynthia Batyi  
Nicole Bilek  
Samentra Braaf  
Sivuyile Buhlungu  
Alida Carstens  
Yolundi Cloete  
Lorraine Coetzee  
Alessandro Companie  
Ilse Davids  
Marwou de Kock  
Bongani Diamond  
Palesa Dolo  
Mzwandile Erasmus  
Juanita Ferreira  
Christal Ferus  
Michelle Fisher  
Hennie Geldenhuys  
Diann Gempies  
Yolande Gregg  
Katie Hadley  
Rieyaat Hassiem  
Roxane Herling  
Yulandi Herselman  
Chris Hikuum  
Henry Issel  
Lungisa Jaxa  
Ruwiyda Jansen  
Fabio Julies  
Fazlin Kafaar  
Masooda Kaskar  
Sophie Keffers  
Xoliswa Kelepu  
Gloria Khomba  
Sandra Kruger  
Sunelza Lakay  
Thelma Leopeng  
Angelique Kany Kany Luabeya  
Simbarashe Mabwe  
Lebohang Makhetha  
Faheema Meyer  
Miriam Moses  
Boitumelo Mosito  
Angelique Mouton  
Munyaradzi Musvosvi  
Julia Noble  
Onke Nombida  
Fajwa Opperman  
Adam Penn-Nicholson  
Christel Petersen  
Patiswa Plaatjie

Abe Pretorius  
Rodney Raphela  
Frances Ratangee  
Maigan Ratangee  
Elisma Schoeman  
Constance Schreuder  
Alison September  
Cashwin September  
Justin Shenje  
Marcia Steyn  
Sonia Stryers  
Liticia Swanepoel  
Anne Swarts  
Asma Toefy  
Petrus Tyambetyu  
Linda van der Merwe  
Elma van Rooyen  
Habibullah Valley  
Ashley Veldsman  
Helen Veldtsman  
Kelvin Vollenhoven  
Elaine Zimri

*TB Modelling Group, TB Centre, Centre for Mathematical Modelling of Infectious Diseases, Department of Infectious Disease Epidemiology, London School of Hygiene & Tropical Medicine, London, United Kingdom.*  
Tom Sumner  
Richard G. White

*The Aurum Institute, Johannesburg, Gauteng, South Africa.*

*Aurum Klerksdorp Site*  
Tebogo Badimo  
Kagiso Baepanye  
Kesenogile Edna Baepanye  
Ken Clarke  
Marelize Collignon  
Audrey Lebohang Dhlamini  
Candice Eyre  
Tebogo Feni  
Welseh Phindile Galane  
Thelma Goliath  
Craig Innes  
Bonita Janse Van Rensburg  
Olebogeng Jonkane  
Boitumelo Sophy Kekana  
Gomotsegang Virginia Khobedi  
Marietjie King  
Ndlela Israel Kunene  
Aneesa Lakhi  
Nondumiso Langa  
Hildah Ledwaba  
Immaculate Mabasa  
Tshegofatso Dorah Mabe  
Nkosinathi Charles Mabuza

Molly Majola  
Mantai Makhetha  
Vernon Malay  
Juanita Market  
Lungile Mbata  
Karabo Moche  
Joseph Panic Moloko  
Kabelo Molosi  
Primrose Mothaga  
Nhlamulo Ndlovu  
Bantubonke Bertrum Ntamo  
Tedrius Ntshauba  
Thandiwe Papalagae  
Pearl Nomsa Sanyaka  
Letlhogonolo Seabela  
Raesibe Agnes Pearl Selepe  
Melissa Neo Senne  
Moeti Serake  
Mugwena Thompo  
Vincent Tshikovhi  
Lebogang Isaac Tswaile

*Aurum Rustenberg Site*

Laudicia Tshenolo Bontsi  
Obakeng Peter Booi  
Mari Cathrin Botha  
William Brumskine  
Kgomotso Violet Chauke  
Mooketsi Theophilius Cwaile  
Isabella Johanna Davies  
Emilia De Klerk  
Blanchard Mbay Iyemosolo  
James Michael Jeleni  
Christian Mabika Kasongo

Christian Mabika Kasongo  
Sebaetseng Jeanette Kekana  
Lucky Siphon Khoza  
Gloria Keitumetse Kolobe  
Lerato Julia Lekagane  
Sheiley Christina Lekotloane  
Ilze Jeanette Louw  
Sarah Teboso Lusale  
Perfect Tiisetso Maatjie  
Kamogelo Fortunate Mabena  
Johanna Thapelo Madikwe  
Octavia Mahkosazana Madikwe  
Rapontwana Letlhogonolo  
Maebana  
Malobisa Sylvester Magwasha  
Vutlhari-I-Vunhenha Fairlord  
Manzini  
Isholedi Samuel Maroele  
Omphile Petunia Masibi  
July Rocky Mathabanzini  
Tendamudzimu Ivan Mathode  
Ellen Ditaba Matsane  
Lungile Mbata  
Nyasha Karen Mhandire  
Thembiwe Miga  
Nosisa Charity Thandeka Mkhize  
Caroline Mkhokho  
Neo Hilda Mkwilase  
Nondzakazi Mnqonywa  
Brenda Matshidiso Modisaotsile  
Patricia Pakiso Mokgetsengoane  
Selemeng Matseliso Carol  
Mokone

Kegomoditswe Magdeline  
Molatlhegi  
Thuso Andrew Molefe  
Motlatsi Evelyn Molotsi  
Tebogo Edwin Montwedi  
Boikanyo Dinah Monyemangene  
Hellen Mokopi Mooketsi  
Tshplpfelo Mapula Mosito  
Ireen Lesebang Mosweu  
Banyana Olga Motlagomang  
Funeka Nomvula Mthembu  
Themba Phakathi  
Mapule Ozma Phatshwane  
Victor Kgothatso Rameetse  
Kelebogile Magdeline Segatsho  
Ni Ni Sein  
Melissa Neo Senne  
Sifiso Cornelius Shezi  
Zona Sithetho  
Bongiwe Stofile  
Mando Mmakhora Thaba  
Lethabo Collen Theko  
Dimakatso Sylvia Tsagae

*Vaccine and Infectious Disease  
Division, Fred Hutchinson  
Cancer Research Center, Seattle,  
WA, USA.*

Bhavesh Borate  
Eva Chung  
Michelle Chung  
Alicia Sato  
Ellis Hughes

## Supplementary Methods

### Statistical analysis

All analyses were performed in R (Boston, MA, USA), version 3.6.1.

#### *Analysis cohorts*

All enrolled participants were used to evaluate associations with baseline *Mycobacterium tuberculosis* (Mtb) sensitisation and prevalent pulmonary tuberculosis (TB). All participants who did not meet the baseline prevalent TB endpoint, and who attended at least one follow-up visit, were included in evaluation of baseline predictors of incident pulmonary TB. Participants who discontinued follow-up prior to 15 months follow-up and did not meet the incident TB study endpoint definition were censored at their final study visit or last negative sputum sample collection. For determination of the diagnostic and prognostic performance of clinical prediction models for pulmonary TB, only enrolled participants with available interferon- $\gamma$  release assay (IGRA) and RISK11 results were included.

#### *Approach to missing data*

Variables considered for inclusion in the analyses were captured in the CORTIS-HR study with low missingness (<10%), had existing evidence of association with TB disease, and were likely to be available to healthcare practitioners in resource-constrained settings. Missing data points, due for example to failed sample collection, were considered missing completely at random, and these participants were excluded from analyses (i.e. complete case analysis only).

#### *Prevalence estimates*

The prevalence of Mtb sensitisation or TB disease (%) was estimated as the proportion of participants with positive baseline IGRA or TB at enrolment. The 95% confidence intervals on prevalence estimates was calculated using the Binomial Wilson method using the R *binom* package.<sup>1</sup>

#### *TB incidence*

The incidence (per 100 person-years) of TB through 15 months was estimated among participants using a time-dependent right-censored non-parametric approach (estimate and variance derived from the Nelson-Aalen estimator<sup>2</sup> of cumulative hazard). Participants with prevalent TB at enrolment, or who only attended the initial enrolment visit (follow-up time = 0), were excluded from this estimate.

#### *Least absolute shrinkage and selection operator regression analyses*

Least absolute shrinkage and selection operator (LASSO) regression analyses, built using the *glmnet* R package<sup>3</sup>, were used to select variables to obtain a parsimonious model and improve prediction accuracy and interpretability. Variables are excluded by LASSO regression (coefficient shrunk to zero) if they are collinear or they do not have an association with the outcome variable, or have very small coefficients and are therefore unlikely to have an association with the outcome variable. To obtain the optimal value of the tuning parameter (lambda), 500 iterations of five-fold cross-validation were performed using a range of lambda values. Balanced folds (i.e. supervised assignment of participants to folds according to dependent/outcome variables) were used to achieve proportional numbers of endpoints in each fold. A choice of five folds was made to yield error rates that do not suffer from either very high variance or high bias.<sup>4</sup> The mean binomial deviance for each fixed value of lambda across the 500 iterations of cross validation were computed, and lambda with the minimum binomial deviance was selected.

#### *Baik2020 clinical score computation*

The Baik et al. (*PloS Medicine*, 2020) clinical score (Baik2020) was designed for empiric diagnosis of TB among adults presenting to primary health clinics while awaiting microbiological results, and was calculated as per the published methods<sup>5</sup>:

| Predictor                          |                                                                                   | Score |
|------------------------------------|-----------------------------------------------------------------------------------|-------|
| Sex                                | Female                                                                            | 0     |
|                                    | Male                                                                              | 1     |
| Age                                | <25 or >44 years                                                                  | 0     |
|                                    | 25-44 years                                                                       | 1     |
| HIV status                         | Negative                                                                          | 0     |
|                                    | Positive                                                                          | 2     |
| Diabetes                           | Non-diabetic                                                                      | 0     |
|                                    | Diabetic                                                                          | 1     |
| Symptom duration > 14 days         | No                                                                                | 0     |
|                                    | Yes                                                                               | 1     |
| Number of WHO TB symptoms reported | One point each for cough (1), fever (1), night sweats (1), and loss of weight (1) | 0-4   |
|                                    |                                                                                   | /10   |

### Hanifa2017 clinical score computation

The Hanifa et al. (*PloS One*, 2017) clinical score (Hanifa2017) was designed as a diagnostic prediction model for symptomatic adults attending clinic for routine HIV care to prioritise TB investigation, and was calculated as per the published methods<sup>6</sup>:

| Predictor                             | Score                       |   |
|---------------------------------------|-----------------------------|---|
| ART status                            | On ART $\geq 3$ months      | 0 |
|                                       | Pre-ART or ART $< 3$ months | 3 |
| BMI, kg/m <sup>2</sup>                | $\geq 25$                   | 0 |
|                                       | 18.5-24.9                   | 2 |
|                                       | $< 18.5$                    | 6 |
| CD4 cell count, cells/mm <sup>3</sup> | $\geq 350$                  | 0 |
|                                       | 200-349                     | 1 |
|                                       | $< 200$                     | 3 |
| Number of WHO TB symptoms reported    | 0-1 symptom                 | 0 |
|                                       | $> 1$ symptom               | 4 |
|                                       | /16                         |   |

### Personalized risk predictor for incident TB (Periskope-TB) computation

The Personalized Risk Predictor for Incident TB (Periskope-TB) clinical prediction tool (Gupta et al., *Nature Medicine* 2020) combines a quantitative measure of T cell sensitisation (IGRA or tuberculin skin test result) and clinical covariates to predict incident TB in low transmission settings (annual incidence  $\leq 20$  per 100,000 persons) with minimal risk of reinfection.<sup>7</sup> The R code provided by the authors ([github.com/rishi-k-gupta/PERISKOPE-TB](https://github.com/rishi-k-gupta/PERISKOPE-TB)) was used to calculate Periskope-TB scores in our cohort, with the following variables and assumptions:

| Variable                                                                            | Assumption                                                                                           |
|-------------------------------------------------------------------------------------|------------------------------------------------------------------------------------------------------|
| Age (years)                                                                         |                                                                                                      |
| Maximum QuantiFERON TB antigen response (higher of TB1 and TB2 tubes; IU/mL)        |                                                                                                      |
| QuantiFERON negative control (IU/mL)                                                |                                                                                                      |
| Was the person tested through contact tracing? (Yes/No)                             | Participants with known household contacts: Yes<br>Participants without known household contacts: No |
| Proximity of index case (Household/non-household)                                   | Household                                                                                            |
| Sputum smear status of index case (Positive/Negative)                               | Positive                                                                                             |
| Was the person tested born abroad? (Yes/No)                                         | Yes                                                                                                  |
| Country of birth                                                                    | South Africa                                                                                         |
| Approximate date of migration                                                       | Set to date of enrolment                                                                             |
| Is the person tested known to be living with HIV? (Yes/No)                          |                                                                                                      |
| Has the person tested received a solid organ or haematological transplant? (Yes/No) |                                                                                                      |
| Preventative treatment commenced? (Yes/No)                                          |                                                                                                      |
| Date of latent TB test                                                              |                                                                                                      |

### Performance of prediction models, RISK11, and IGRA

Diagnostic and prognostic performance was assessed with binary receiver operating characteristic (ROC) analysis to calculate the AUC using the *pROC* R package<sup>8</sup>. Binary ROC AUCs were compared using the DeLong test.<sup>9</sup> Sensitivity, specificity, positive predictive value (PPV), and negative predictive value (NPV) at each threshold were calculated using binary endpoint indicators and standard formulae. The 95% confidence intervals (CIs) on diagnostic and prognostic performance estimates were calculated with a non-parametric percentile bootstrap with 10,000 resamples.<sup>10</sup> Diagnostic and prognostic accuracy were benchmarked against the minimum WHO target product profile (TPP) thresholds for a community-based TB triage or referral test<sup>11</sup> (specificity 70% and sensitivity 90%) and the minimal WHO TPP thresholds for an incipient TB test, to predict progression to TB disease<sup>12</sup> (specificity 75% and sensitivity 75%), respectively.

### Derivation and testing of LASSO clinical prediction models in the CORTIS-HR cohort

For the derivation and testing of diagnostic and prognostic TB clinical prediction models, the cohort was randomly split into training (67%) and test (33%) sets with proportional numbers of TB cases in each (i.e. 3-fold cross-validation). The training set was used to construct diagnostic and prognostic TB disease risk models using LASSO penalisation for feature selection, with or without the addition of RISK11 or IGRA. Study site was not included in the LASSO clinical prediction models as this variable is not generalisable to other settings.

Binomial LASSO regression analyses were built using the *glmnet* R package<sup>3</sup>. To obtain the optimal value of the tuning parameter (lambda), 50 iterations of five-fold cross-validation were performed using a range of lambda values. Balanced folds (i.e. supervised assignment of participants to folds according to dependent/outcome variables) were used to achieve proportional numbers of endpoints in each fold. The mean area under the curve (AUC) for each fixed value of lambda across the 50 iterations of cross validation was computed, and lambda with the maximum AUC across the 50 cross-validation iterations selected. Model performance was then evaluated in the test set. This procedure was repeated 1,000 times to obtain more reliable AUC estimates, randomly splitting the cohort into 1,000 training and test sets to derive and test LASSO models. The mean cross-validated AUC (CV-AUC) estimates and 95% confidence interval across the 1,000 iterations are reported. Relative feature importance was calculated as the number of times each feature was included in a model divided by the total iterations of model training.

## Supplementary Figures

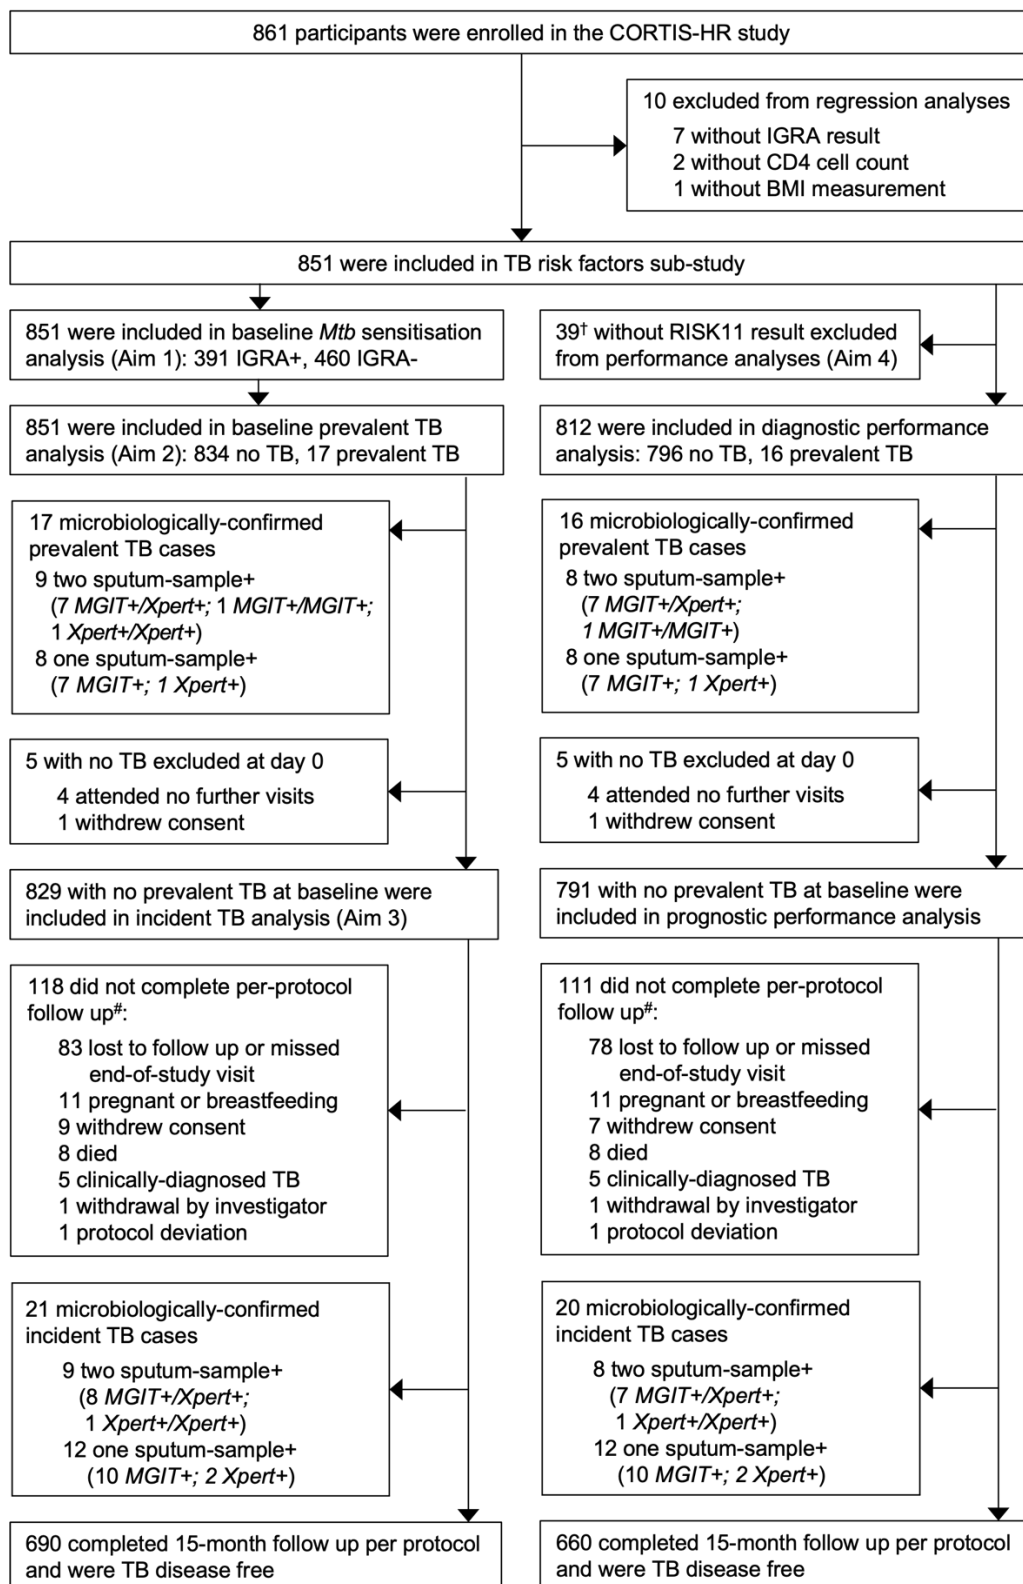

**Supplementary Figure 1: Enrolment and follow-up**

<sup>#</sup>Participants who did not complete follow-up per-protocol were included in incident TB analysis but censored as TB disease free at their last study visit. Eight deaths were reported during study follow-up; three of unnatural causes, one of acute gastroenteritis, three of unknown causes, and one from suspected abdominal TB.

<sup>†</sup>Two without PAXgene RNA and 37 with indeterminate result due to inadequate quality of the RNA sample. TB, tuberculosis (disease). *Mtb*, *Mycobacterium tuberculosis*. IGRA, interferon- $\gamma$  release assay. BMI, body-mass index. MGIT, Mycobacteria Growth Indicator Tube. Xpert, GeneXpert MTB/RIF or Ultra.

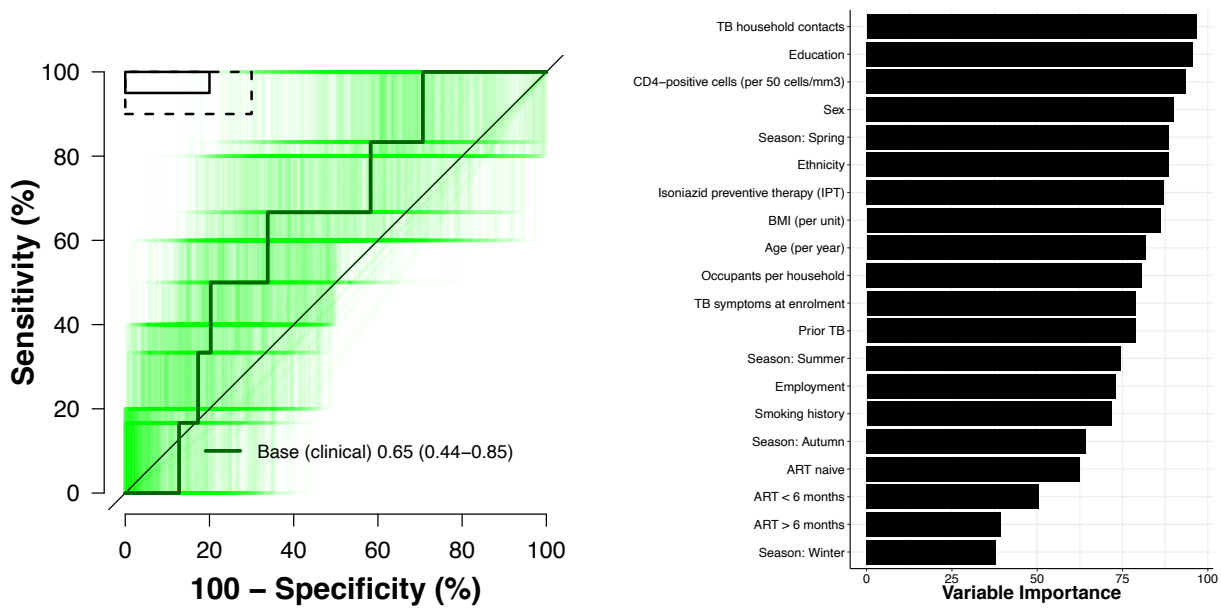

**Supplementary Figure 2: Diagnostic performance of LASSO regression clinical prediction models derived and tested in the CORTIS-HR cohort**

(a) The receiver operating characteristic (ROC) curves depict test set diagnostic performance (area under the curve, AUC, with 95% CI) of 1,000 LASSO regression clinical prediction models for prevalent TB diagnosed on one or more liquid culture-positive or Xpert MTB/RIF-positive sputum samples. Each of the 1,000 green ROC curves depict performance in an individual test set. The mean cross-validated AUC is represented in dark green. The solid box depicts the optimal criteria (95% sensitivity and 80% specificity) and the dashed box depicts the minimal criteria (90% sensitivity and 70% specificity) set out in the WHO Target Product Profile for a TB triage test.<sup>11</sup> (b) Relative feature importance in the clinical models.

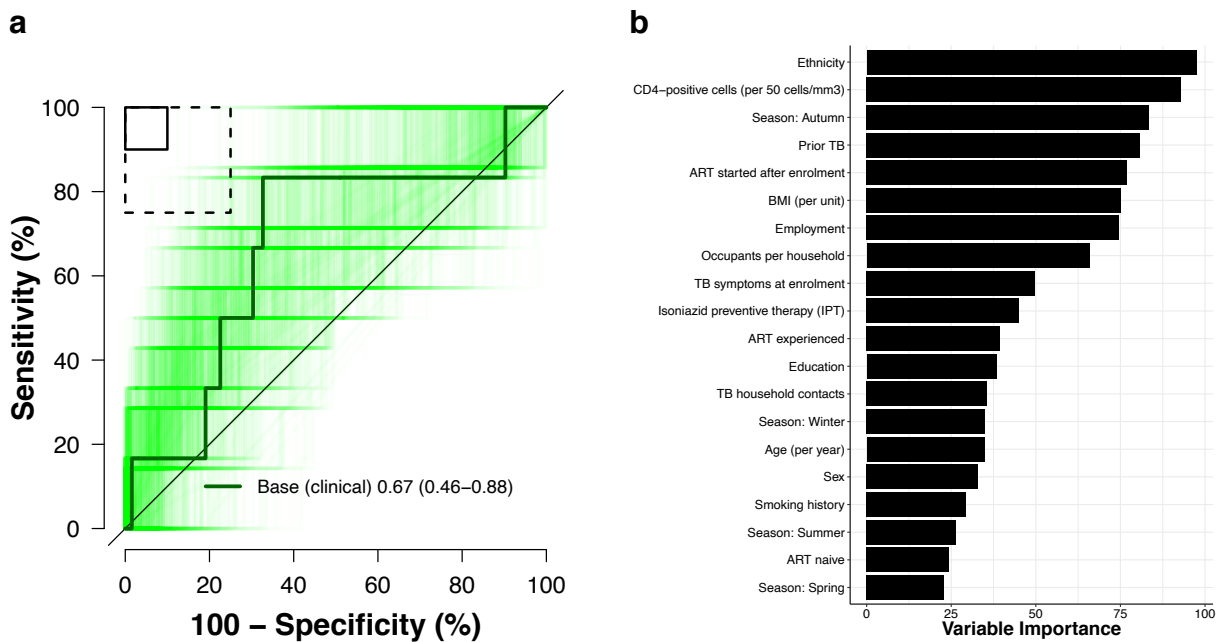

**Supplementary Figure 3: Prognostic performance for incident TB through 15 months follow-up of LASSO regression clinical prediction models derived and tested in the CORTIS-HR cohort**

(a) The receiver operating characteristic (ROC) curves depict test set prognostic performance (area under the curve, AUC, with 95% CI) of 1,000 LASSO regression clinical prediction models for incident TB diagnosed through 15 months follow-up on one or more liquid culture-positive or Xpert MTB/RIF-positive sputum samples. Each of the 1,000 green ROC curves depict performance in an individual test set. The mean cross-validated AUC is represented in dark green. The solid box depicts the optimal criteria (90% sensitivity and 90% specificity) and the dashed box depicts the minimal criteria (75% sensitivity and 75% specificity) set out in the WHO Target Product Profile for an incipient TB test.<sup>12</sup> (b) Relative feature importance in the clinical models.

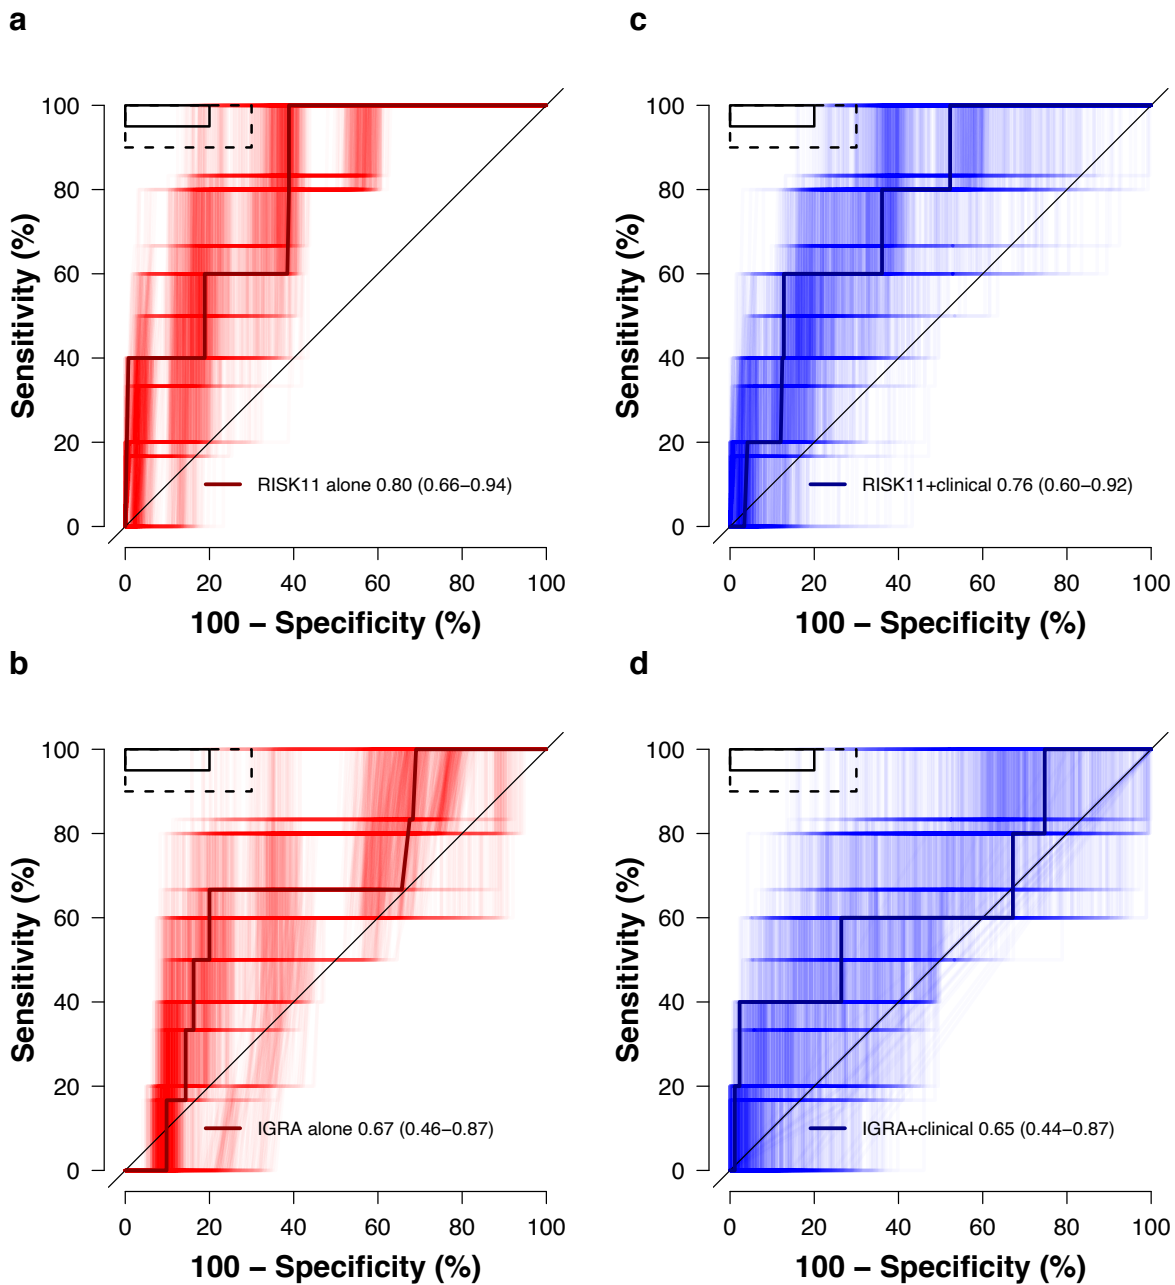

**Supplementary Figure 4: Diagnostic performance of LASSO regression clinical prediction models incorporating RISK11 or the interferon- $\gamma$  release assay derived and tested in the CORTIS-HR cohort**

The receiver operating characteristic (ROC) curves depict test set diagnostic performance (area under the curve, AUC, with 95% CI) of (a) RISK11 alone and (b) the interferon- $\gamma$  release assay (IGRA) alone, and 1,000 LASSO regression clinical prediction models incorporating (c) RISK11 or (d) IGRA, for prevalent TB diagnosed on one or more liquid culture-positive or Xpert MTB/RIF-positive sputum samples. Each of the 1,000 red or blue ROC curves depict performance in an individual test set. The mean cross-validated AUC is represented in dark red or dark blue. The solid box depicts the optimal criteria (95% sensitivity and 80% specificity) and the dashed box depicts the minimal criteria (90% sensitivity and 70% specificity) set out in the WHO Target Product Profile for a TB triage test.<sup>11</sup>



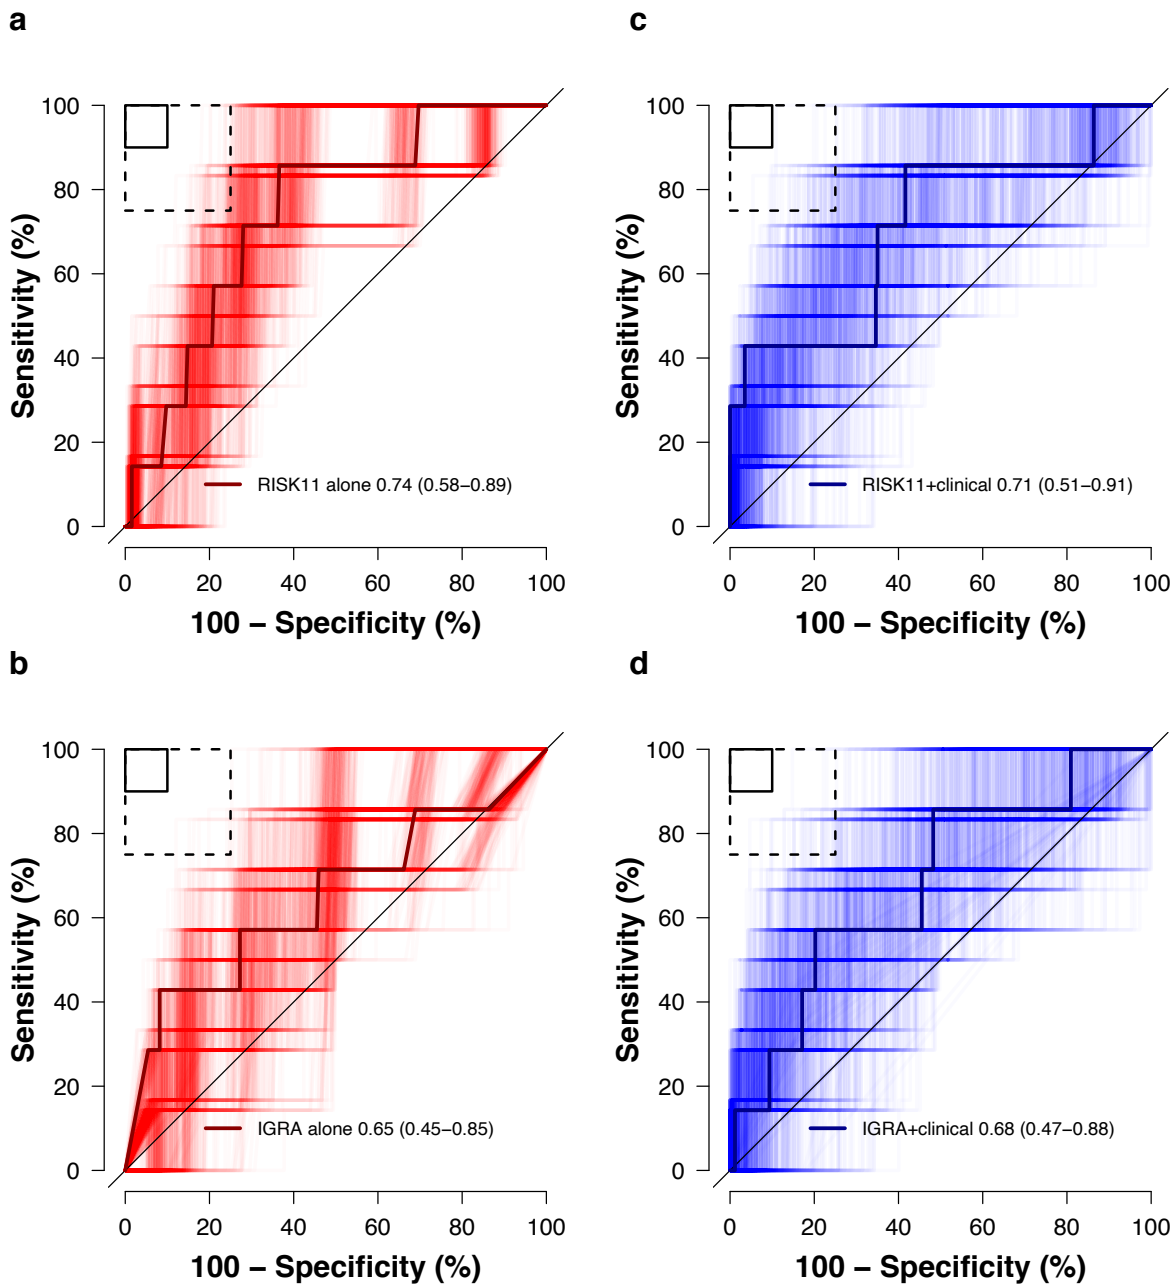

**Supplementary Figure 5: Prognostic performance for incident TB through 15 months follow-up of LASSO regression clinical prediction models incorporating RISK11 or the interferon- $\gamma$  release assay derived and tested in the CORTIS-HR cohort**

The receiver operating characteristic (ROC) curves depict test set prognostic performance (area under the curve, AUC, with 95% CI) of (a) RISK11 alone and (b) the interferon- $\gamma$  release assay (IGRA) alone, and 1,000 LASSO regression clinical prediction models incorporating (c) RISK11 or (d) IGRA, for incident TB diagnosed through 15 months follow-up on one or more liquid culture-positive or Xpert MTB/RIF-positive sputum samples. Each of the 1,000 red or blue ROC curves depict performance in an individual test set. The mean cross-validated AUC is represented in dark red or dark blue. The solid box depicts the optimal criteria (90% sensitivity and 90% specificity) and the dashed box depicts the minimal criteria (75% sensitivity and 75% specificity) set out in the WHO Target Product Profile for an incipient TB test.<sup>12</sup>

## Supplementary Tables

**Supplementary Table 1: Regression analyses examining factors associated with *Mycobacterium tuberculosis* sensitisation in people living with HIV**

|                                                  | Study cohort<br>N = 851 | IGRA-, n (%) or median (IQR)<br>N=460 | IGRA+, n (%) or median (IQR)<br>N=391 | Univariable logistic regression |                              | Multivariable binomial LASSO regression with selective inference |              |
|--------------------------------------------------|-------------------------|---------------------------------------|---------------------------------------|---------------------------------|------------------------------|------------------------------------------------------------------|--------------|
|                                                  |                         |                                       |                                       | OR (95%CI)                      | p value                      | aOR (95%CI)                                                      | p value      |
| Sex                                              |                         |                                       |                                       |                                 |                              |                                                                  |              |
| Female                                           | 617 (72.5)              | 344 (74.8)                            | 273 (69.8)                            | Reference                       |                              | Reference                                                        |              |
| Male                                             | 234 (27.5)              | 116 (25.2)                            | 118 (30.2)                            | 1.28 (0.95, 1.73)               | 0.11                         | 1.11 (0.13, 1.25)                                                | 0.78         |
| Age (years)                                      | 35 (29-42)              | 35 (29-42)                            | 35 (29-42)                            | 1.00 (0.98, 1.01)               | 0.86                         | -                                                                | -            |
| Ethnicity                                        |                         |                                       |                                       |                                 |                              |                                                                  |              |
| Black African                                    | 716 (84.1)              | 400 (87.0)                            | 316 (80.8)                            | Reference                       |                              | Reference                                                        |              |
| Mixed Ancestry                                   | 135 (15.9)              | 60 (13.0)                             | 75 (19.2)                             | 1.58 (1.09, 2.30)               | <b>0.015</b>                 | 1.10 (0.41, 1.28)                                                | 0.62         |
| Site                                             |                         |                                       |                                       |                                 | <b>&lt;0.001<sup>‡</sup></b> |                                                                  |              |
| Durban, KwaZulu-Natal                            | 295 (34.7)              | 166 (36.1)                            | 129 (33.0)                            | Reference                       |                              | -                                                                | -            |
| Klerksdorp, North West                           | 160 (18.8)              | 69 (15.0)                             | 91 (23.3)                             | 1.70 (1.15, 2.51)               | <b>0.008</b>                 | 1.27 (1.00, 1.49) <sup>†</sup>                                   | <b>0.024</b> |
| Rustenburg, North West                           | 158 (18.6)              | 107 (23.3)                            | 51 (13.0)                             | 0.61 (0.41, 0.92)               | <b>0.018</b>                 | 0.86 (0.67, 1.06) <sup>†</sup>                                   | 0.069        |
| Ravensmead, Western Cape                         | 89 (10.5)               | 42 (9.1)                              | 47 (12.0)                             | 1.44 (0.90, 2.32)               | 0.13                         | -                                                                | -            |
| Worcester, Western Cape                          | 149 (17.5)              | 76 (16.5)                             | 73 (18.7)                             | 1.24 (0.83, 1.84)               | 0.29                         | -                                                                | -            |
| Highest level of schooling                       |                         |                                       |                                       |                                 |                              |                                                                  |              |
| Primary school or lower                          | 100 (11.8)              | 49 (10.7)                             | 51 (13.0)                             | Reference                       |                              | Reference                                                        |              |
| Secondary school or higher                       | 751 (88.2)              | 411 (89.3)                            | 340 (87.0)                            | 0.79 (0.52, 1.21)               | 0.28                         | 0.93 (0.82, 1.82)                                                | 0.58         |
| Employment                                       |                         |                                       |                                       |                                 |                              |                                                                  |              |
| Employed                                         | 134 (15.7)              | 77 (16.7)                             | 57 (14.6)                             | Reference                       |                              | Reference                                                        |              |
| Unemployed                                       | 717 (84.3)              | 383 (83.3)                            | 334 (85.4)                            | 1.18 (0.81, 1.72)               | 0.39                         | 1.08 (0.38, 1.21)                                                | 0.68         |
| Occupants per household                          | 4 (3-6)                 | 4 (3-7)                               | 4 (3-6)                               | 0.97 (0.93, 1.02)               | 0.25                         | 0.89 (0.69, 1.28)                                                | 0.26         |
| Smoking history                                  |                         |                                       |                                       |                                 |                              |                                                                  |              |
| No                                               | 522 (61.3)              | 309 (67.2)                            | 213 (54.5)                            | Reference                       |                              | Reference                                                        |              |
| Yes                                              | 329 (38.7)              | 151 (32.8)                            | 178 (45.5)                            | 1.71 (1.30, 2.26)               | <b>&lt;0.001</b>             | 1.19 (0.96, 2.97)                                                | <b>0.040</b> |
| Prior TB                                         |                         |                                       |                                       |                                 |                              |                                                                  |              |
| No                                               | 643 (75.6)              | 348 (75.7)                            | 295 (75.4)                            | Reference                       |                              | -                                                                | -            |
| Yes                                              | 208 (24.4)              | 112 (24.3)                            | 96 (24.6)                             | 1.01 (0.74, 1.38)               | 0.94                         | -                                                                | -            |
| TB household contacts                            |                         |                                       |                                       |                                 |                              |                                                                  |              |
| No                                               | 691 (81.2)              | 381 (82.8)                            | 310 (79.3)                            | Reference                       |                              | Reference                                                        |              |
| Yes                                              | 160 (18.8)              | 79 (17.2)                             | 81 (20.7)                             | 1.26 (0.89, 1.78)               | 0.19                         | 1.11 (0.76, 1.28)                                                | 0.31         |
| Isoniazid preventive therapy at enrolment        |                         |                                       |                                       |                                 |                              |                                                                  |              |
| Not on therapy                                   | 805 (94.6)              | 433 (94.1)                            | 372 (95.1)                            | Reference                       |                              | -                                                                | -            |
| On therapy                                       | 46 (5.4)                | 27 (5.9)                              | 19 (4.9)                              | 0.82 (0.44, 1.49)               | 0.52                         | -                                                                | -            |
| Antiretroviral therapy at enrolment              |                         |                                       |                                       |                                 |                              |                                                                  |              |
| Naïve                                            | 190 (22.3)              | 94 (20.4)                             | 96 (24.6)                             | Reference                       | 0.16 <sup>‡</sup>            | -                                                                | -            |
| <6 months                                        | 114 (13.4)              | 57 (12.4)                             | 57 (14.6)                             | 0.98 (0.62, 1.56)               | 0.93                         | -                                                                | -            |
| ≥6 months                                        | 547 (64.3)              | 309 (67.2)                            | 238 (60.9)                            | 0.75 (0.54, 1.05)               | 0.095                        | 0.85 (0.72, 1.06) <sup>†</sup>                                   | 0.070        |
| Body-mass index (kg/m <sup>2</sup> )             | 24.2 (20.6-31.2)        | 24.5 (20.1-31.6)                      | 24.1 (20.9-30.5)                      | 1.00 (0.98, 1.02)               | 0.90                         | 1.14 (0.29, 1.29)                                                | 0.65         |
| CD4-positive cell count (cells/mm <sup>3</sup> ) | 530.0 (353.5-726.0)     | 485.5 (327.5-691.2)                   | 567.0 (393.5-770.0)                   | 1.05 (1.02, 1.07) *             | <b>&lt;0.001</b>             | 1.48 (1.12, 1.77) *                                              | <b>0.006</b> |
| HIV plasma viral load                            |                         |                                       |                                       |                                 |                              |                                                                  |              |
| <100 copies/mL                                   | 180 (44.1)              | 94 (43.1)                             | 86 (45.3)                             | Reference                       |                              | #                                                                | #            |
| ≥100 copies/mL                                   | 228 (55.9)              | 124 (56.9)                            | 104 (54.7)                            | 0.92 (0.62, 1.36)               | 0.66                         |                                                                  |              |
| Not tested (missing)                             | 443                     | 242                                   | 201                                   | -                               | -                            |                                                                  |              |
| Season at enrolment                              |                         |                                       |                                       |                                 | <b>0.013<sup>‡</sup></b>     |                                                                  |              |
| Spring                                           | 204 (24.0)              | 95 (20.7)                             | 109 (27.9)                            | Reference                       |                              | 1.02 (0.46, 1.22) <sup>†</sup>                                   | 0.72         |
| Summer                                           | 220 (25.9)              | 131 (28.5)                            | 89 (22.8)                             | 0.59 (0.40, 0.87)               | <b>0.008</b>                 | 0.85 (0.57, 1.21) <sup>†</sup>                                   | 0.15         |
| Autumn                                           | 191 (22.4)              | 114 (24.8)                            | 77 (19.7)                             | 0.59 (0.39, 0.88)               | <b>0.009</b>                 | 0.82 (0.56, 1.10) <sup>†</sup>                                   | 0.076        |
| Winter                                           | 236 (27.7)              | 120 (26.1)                            | 116 (29.7)                            | 0.84 (0.58, 1.23)               | 0.37                         | -                                                                | -            |
| TB symptoms at enrolment                         |                         |                                       |                                       |                                 |                              |                                                                  |              |
| No                                               | 804 (94.5)              | 442 (96.1)                            | 362 (92.6)                            | Reference                       |                              | Reference                                                        |              |
| Yes                                              | 47 (5.5)                | 18 (3.9)                              | 29 (7.4)                              | 1.97 (1.08, 3.66)               | <b>0.028</b>                 | 1.13 (0.86, 1.32)                                                | 0.17         |
| TB status                                        |                         |                                       |                                       |                                 | <b>0.016<sup>‡</sup></b>     |                                                                  |              |
| No TB                                            | 813 (95.5)              | 448 (97.4)                            | 365 (93.4)                            | Reference                       |                              | 0.80 (0.69, 0.94) <sup>†</sup>                                   | <b>0.006</b> |
| Prevalent TB                                     | 17 (2.0)                | 5 (1.1)                               | 12 (3.1)                              | 2.95 (1.08, 9.33)               | <b>0.044</b>                 | -                                                                | -            |
| Incident TB                                      | 21 (2.5)                | 7 (1.5)                               | 14 (3.6)                              | 2.45 (1.01, 6.54)               | 0.055                        | -                                                                | -            |

IQR, interquartile range. CI, confidence interval. OR, odds ratio. aOR, adjusted OR. IGRA, interferon- $\gamma$  release assay. TB, tuberculosis. \*Per 50 cells/mm<sup>3</sup>. #Excluded from LASSO analysis. <sup>†</sup>Reference group includes all other levels of variable. <sup>‡</sup>Likelihood-ratio test for significance of categorical variable.

**Supplementary Table 2: Baseline characteristics of CORTIS-HR study cohort by clinical site in all enrolled participants**

|                                                              | <b>Overall<br/>N=861</b> | <b>Durban<br/>N=300</b> | <b>Klerksdorp<br/>N=160</b> | <b>Rustenburg<br/>N=161</b> | <b>Ravensmead<br/>N=90</b> | <b>Worcester<br/>N=150</b> |
|--------------------------------------------------------------|--------------------------|-------------------------|-----------------------------|-----------------------------|----------------------------|----------------------------|
| <b>Baseline characteristics at study enrolment</b>           |                          |                         |                             |                             |                            |                            |
| Female sex, n (%)                                            | 621 (72.1)               | 217 (72.3)              | 102 (63.7)                  | 113 (70.2)                  | 66 (73.3)                  | 123 (82.0)                 |
| Median age, years (IQR)                                      | 35 (29-42)               | 35 (29-42)              | 32 (27-38)                  | 34 (29-40)                  | 38 (30-46)                 | 38 (31-44)                 |
| Ethnicity, n (%)                                             |                          |                         |                             |                             |                            |                            |
| Black African                                                | 724 (84.1)               | 299 (99.7)              | 159 (99.4)                  | 160 (99.4)                  | 3 (3.3)                    | 103 (68.7)                 |
| Mixed Ancestry                                               | 137 (15.9)               | 1 (0.3)                 | 1 (0.6)                     | 1 (0.6)                     | 87 (96.7)                  | 47 (31.3)                  |
| Median body-mass index, kg/m <sup>2</sup> (IQR)              | 24.2 (20.6-31.2)         | 25.9 (21.7-32.3)        | 22.6 (19.3-29.7)            | 23.8 (20.3-29.8)            | 20.7 (18.8-27.2)           | 26.2 (21.9-32.2)           |
| Smoking history, n (%)                                       | 334 (38.8)               | 92 (30.7)               | 61 (38.1)                   | 43 (26.7)                   | 69 (76.7)                  | 69 (46.0)                  |
| Prior tuberculosis, n (%)                                    | 212 (24.6)               | 73 (24.3)               | 31 (19.4)                   | 25 (15.5)                   | 32 (35.6)                  | 51 (34.0)                  |
| Tuberculosis household contacts, n (%)                       | 160 (18.6)               | 77 (25.7)               | 21 (13.1)                   | 23 (14.3)                   | 30 (33.3)                  | 9 (6.0)                    |
| IGRA result, n (%)                                           |                          |                         |                             |                             |                            |                            |
| Not available                                                | 7 (0.8)                  | 4 (1.3)                 | 0                           | 3 (1.9)                     | 0                          | 0                          |
| Negative                                                     | 461 (53.5)               | 167 (55.7)              | 69 (43.1)                   | 107 (66.5)                  | 42 (46.7)                  | 76 (50.7)                  |
| Positive                                                     | 393 (45.6)               | 129 (43.0)              | 91 (56.9)                   | 51 (31.7)                   | 48 (53.3)                  | 74 (49.3)                  |
| Isoniazid preventive therapy (IPT), n (%)                    |                          |                         |                             |                             |                            |                            |
| On IPT at enrolment                                          | 47 (5.5)                 | 10 (3.3)                | 11 (6.9)                    | 15 (9.3)                    | 8 (8.9)                    | 3 (2.0)                    |
| Started IPT after enrolment                                  | 370 (43.0)               | 262 (87.3)              | 18 (11.2)                   | 24 (14.9)                   | 38 (42.2)                  | 28 (18.7)                  |
| Did not take IPT during study                                | 444 (51.6)               | 28 (9.3)                | 131 (81.9)                  | 122 (75.8)                  | 44 (48.9)                  | 119 (79.3)                 |
| Antiretroviral therapy at enrolment, n (%)                   |                          |                         |                             |                             |                            |                            |
| Naïve                                                        | 193 (22.4)               | 57 (19.0)               | 48 (30.0)                   | 40 (24.8)                   | 12 (13.3)                  | 36 (24.0)                  |
| <6 months                                                    | 115 (13.4)               | 27 (9.0)                | 33 (20.6)                   | 32 (19.9)                   | 16 (17.8)                  | 7 (4.7)                    |
| 6-12 months                                                  | 66 (7.7)                 | 23 (7.7)                | 17 (10.6)                   | 12 (7.5)                    | 9 (10.0)                   | 5 (3.3)                    |
| >12 months                                                   | 487 (56.6)               | 193 (64.3)              | 62 (38.8)                   | 77 (47.8)                   | 53 (58.9)                  | 102 (68.0)                 |
| Started antiretroviral therapy during study, n (%)           | 142/193 (73.6)           | 50/57 (87.7)            | 37/48 (77.1)                | 27/40 (67.5)                | 5/12 (41.7)                | 23/36 (63.9)               |
| Median CD4-positive cells, cells/mm <sup>3</sup> (IQR)       | 529 (349.5-724.5)        | 544 (344.5-713.5)       | 532.5 (361.8-735)           | 545 (361.748)               | 515 (335.735)              | 495.5 (348.697)            |
| Tuberculosis symptoms positive at enrolment, n (%)           | 51 (5.9)                 | 21 (7.0)                | 1 (0.6)                     | 3 (1.9)                     | 18 (20.0)                  | 8 (5.3)                    |
| <b>Tuberculosis endpoints (≥1 sputum sample positive)</b>    |                          |                         |                             |                             |                            |                            |
| Prevalent tuberculosis, n (%; 95% CI)                        | 18 (2.1; 1.3-3.3)        | 7 (2.3; 1.1-4.7)        | 0                           | 1 (0.6; 0.1-3.4)            | 0                          | 10 (6.7; 3.7-11.8)         |
| Incident tuberculosis, n (rate per 100 person-years; 95% CI) | 21 (2.3; 1.3-3.2)        | 6 (1.8; 0.4-3.1)        | 1 (0.5; 0.1-1.5)            | 2 (1.2; 0.2-2.8)            | 5 (5.7; 0.7-10.3)          | 7 (4.3; 1.1-7.4)           |

IQR, inter-quartile range. IGRA, interferon- $\gamma$  release assay. CI, confidence interval.

**Supplementary Table 3: Regression analyses examining factors associated with *Mycobacterium tuberculosis* sensitisation in people living with HIV (sensitivity analysis with site removed from LASSO regression)**

|                                                  | Study cohort<br>N = 851 | IGRA-, n (%)<br>or median<br>(IQR)<br>N=460 | IGRA+, n (%)<br>or median<br>(IQR)<br>N=391 | Multivariable binomial LASSO<br>regression with selective inference |              |
|--------------------------------------------------|-------------------------|---------------------------------------------|---------------------------------------------|---------------------------------------------------------------------|--------------|
|                                                  |                         |                                             |                                             | aOR (95%CI)                                                         | p value      |
| Sex                                              |                         |                                             |                                             |                                                                     |              |
| Female                                           | 617 (72.5)              | 344 (74.8)                                  | 273 (69.8)                                  | Reference                                                           |              |
| Male                                             | 234 (27.5)              | 116 (25.2)                                  | 118 (30.2)                                  | 1.11 (0.25, 1.27)                                                   | 0.71         |
| Age (years)                                      | 35 (29.42)              | 35 (29.42)                                  | 35 (29.42)                                  | -                                                                   | -            |
| Ethnicity                                        |                         |                                             |                                             |                                                                     |              |
| Black African                                    | 716 (84.1)              | 400 (87.0)                                  | 316 (80.8)                                  | Reference                                                           |              |
| Mixed Ancestry                                   | 135 (15.9)              | 60 (13.0)                                   | 75 (19.2)                                   | 1.07 (0.37, 1.24)                                                   | 0.69         |
| Site                                             |                         |                                             |                                             |                                                                     |              |
| Durban, KwaZulu-Natal                            | 295 (34.7)              | 166 (36.1)                                  | 129 (33.0)                                  |                                                                     |              |
| Klerksdorp, North West                           | 160 (18.8)              | 69 (15.0)                                   | 91 (23.3)                                   | #                                                                   | #            |
| Rustenburg, North West                           | 158 (18.6)              | 107 (23.3)                                  | 51 (13.0)                                   |                                                                     |              |
| Ravensmead, Western Cape                         | 89 (10.5)               | 42 (9.1)                                    | 47 (12.0)                                   |                                                                     |              |
| Worcester, Western Cape                          | 149 (17.5)              | 76 (16.5)                                   | 73 (18.7)                                   |                                                                     |              |
| Highest level of schooling                       |                         |                                             |                                             |                                                                     |              |
| Primary school or lower                          | 100 (11.8)              | 49 (10.7)                                   | 51 (13.0)                                   | Reference                                                           |              |
| Secondary school or higher                       | 751 (88.2)              | 411 (89.3)                                  | 340 (87.0)                                  | 0.95 (0.84, 2.23)                                                   | 0.69         |
| Employment                                       |                         |                                             |                                             |                                                                     |              |
| Employed                                         | 134 (15.7)              | 77 (16.7)                                   | 57 (14.6)                                   | Reference                                                           |              |
| Unemployed                                       | 717 (84.3)              | 383 (83.3)                                  | 334 (85.4)                                  | 1.1 (0.61, 1.25)                                                    | 0.45         |
| Occupants per household                          | 4 (3.6)                 | 4 (3.7)                                     | 4 (3.6)                                     | 0.87 (0.71, 1.13)                                                   | 0.13         |
| Smoking history                                  |                         |                                             |                                             |                                                                     |              |
| No                                               | 522 (61.3)              | 309 (67.2)                                  | 213 (54.5)                                  | Reference                                                           |              |
| Yes                                              | 329 (38.7)              | 151 (32.8)                                  | 178 (45.5)                                  | 1.22 (1.00, 2.32)                                                   | <b>0.024</b> |
| Prior TB                                         |                         |                                             |                                             |                                                                     |              |
| No                                               | 643 (75.6)              | 348 (75.7)                                  | 295 (75.4)                                  |                                                                     |              |
| Yes                                              | 208 (24.4)              | 112 (24.3)                                  | 96 (24.6)                                   | -                                                                   | -            |
| TB household contacts                            |                         |                                             |                                             |                                                                     |              |
| No                                               | 691 (81.2)              | 381 (82.8)                                  | 310 (79.3)                                  | Reference                                                           |              |
| Yes                                              | 160 (18.8)              | 79 (17.2)                                   | 81 (20.7)                                   | 1.11 (0.78, 1.27)                                                   | 0.29         |
| Isoniazid preventive therapy at enrolment        |                         |                                             |                                             |                                                                     |              |
| Not on therapy                                   | 805 (94.6)              | 433 (94.1)                                  | 372 (95.1)                                  |                                                                     |              |
| On therapy                                       | 46 (5.4)                | 27 (5.9)                                    | 19 (4.9)                                    | -                                                                   | -            |
| Antiretroviral therapy at enrolment              |                         |                                             |                                             |                                                                     |              |
| Naïve                                            | 190 (22.3)              | 94 (20.4)                                   | 96 (24.6)                                   | -                                                                   | -            |
| <6 months                                        | 114 (13.4)              | 57 (12.4)                                   | 57 (14.6)                                   | -                                                                   | -            |
| ≥6 months                                        | 547 (64.3)              | 309 (67.2)                                  | 238 (60.9)                                  | 0.84 (0.72, 1.02) <sup>†</sup>                                      | <b>0.036</b> |
| Body-mass index (kg/m <sup>2</sup> )             | 24.2 (20.6-31.2)        | 24.5 (20.1-31.6)                            | 24.1 (20.9-30.5)                            | 1.13 (0.43, 1.29)                                                   | 0.57         |
| CD4-positive cell count (cells/mm <sup>3</sup> ) | 530.0 (353.5-726.0)     | 485.5 (327.5-691.2)                         | 567.0 (393.5-770.0)                         | 1.47 (1.19, 1.72) *                                                 | <b>0.001</b> |
| HIV plasma viral load                            |                         |                                             |                                             |                                                                     |              |
| <100 copies/mL                                   | 180 (44.1)              | 94 (43.1)                                   | 86 (45.3)                                   | #                                                                   | #            |
| ≥100 copies/mL                                   | 228 (55.9)              | 124 (56.9)                                  | 104 (54.7)                                  |                                                                     |              |
| Not tested (missing)                             | 443                     | 242                                         | 201                                         |                                                                     |              |
| Season at enrolment                              |                         |                                             |                                             |                                                                     |              |
| Spring                                           | 204 (24.0)              | 95 (20.7)                                   | 109 (27.9)                                  | 1.02 (0.40, 1.20) <sup>†</sup>                                      | 0.76         |
| Summer                                           | 220 (25.9)              | 131 (28.5)                                  | 89 (22.8)                                   | 0.86 (0.55, 1.17) <sup>†</sup>                                      | 0.13         |
| Autumn                                           | 191 (22.4)              | 114 (24.8)                                  | 77 (19.7)                                   | 0.84 (0.54, 1.11) <sup>†</sup>                                      | 0.087        |
| Winter                                           | 236 (27.7)              | 120 (26.1)                                  | 116 (29.7)                                  | -                                                                   | -            |
| TB symptoms at enrolment                         |                         |                                             |                                             |                                                                     |              |
| No                                               | 804 (94.5)              | 442 (96.1)                                  | 362 (92.6)                                  | Reference                                                           |              |
| Yes                                              | 47 (5.5)                | 18 (3.9)                                    | 29 (7.4)                                    | 1.12 (0.86, 1.34)                                                   | 0.18         |
| TB status                                        |                         |                                             |                                             |                                                                     |              |
| No TB                                            | 813 (95.5)              | 448 (97.4)                                  | 365 (93.4)                                  | 0.81 (0.69, 0.95) <sup>†</sup>                                      | <b>0.008</b> |
| Prevalent TB                                     | 17 (2.0)                | 5 (1.1)                                     | 12 (3.1)                                    | -                                                                   | -            |
| Incident TB                                      | 21 (2.5)                | 7 (1.5)                                     | 14 (3.6)                                    | -                                                                   | -            |

IQR, interquartile range. CI, confidence interval. OR, odds ratio. aOR, adjusted OR. IGRA, interferon- $\gamma$  release assay. TB, tuberculosis. \*Per 50 cells/mm<sup>3</sup>. #Excluded from LASSO analysis. <sup>†</sup>Reference group includes all other levels of variable.

**Supplementary Table 4: Regression analyses examining factors associated with prevalent TB disease in people living with HIV (sensitivity analysis with site removed from LASSO regression)**

|                                                  | No prevalent TB,<br>n (%) or median (IQR)<br><br>N=834 | Prevalent TB,<br>n (%) or median (IQR)<br><br>N=17 | Multivariable binomial LASSO<br>regression with selective inference |              |
|--------------------------------------------------|--------------------------------------------------------|----------------------------------------------------|---------------------------------------------------------------------|--------------|
|                                                  |                                                        |                                                    | aOR (95%CI)                                                         | p value      |
| Sex                                              |                                                        |                                                    |                                                                     |              |
| Female                                           | 608 (72.9)                                             | 9 (52.9)                                           |                                                                     |              |
| Male                                             | 226 (27.1)                                             | 8 (47.1)                                           | -                                                                   | -            |
| Age                                              | 35 (29.42)                                             | 36 (33.42)                                         | 1.38 (0.09, 9.12)                                                   | 0.45         |
| Ethnicity                                        |                                                        |                                                    |                                                                     |              |
| Black African                                    | 704 (84.4)                                             | 12 (70.6)                                          | Reference                                                           |              |
| Mixed Ancestry                                   | 130 (15.6)                                             | 5 (29.4)                                           | 1.20 (0.13, >1000)                                                  | 0.18         |
| Site                                             |                                                        |                                                    |                                                                     |              |
| Durban, KwaZulu-Natal                            | 288 (34.5)                                             | 7 (41.2)                                           |                                                                     |              |
| Klerksdorp, North West                           | 160 (19.2)                                             | 0 (0.0)                                            | #                                                                   | #            |
| Rustenburg, North West                           | 158 (18.9)                                             | 0 (0.0)                                            |                                                                     |              |
| Ravensmead, Western Cape                         | 89 (10.7)                                              | 0 (0.0)                                            |                                                                     |              |
| Worcester, Western Cape                          | 139 (16.7)                                             | 10 (58.8)                                          |                                                                     |              |
| Highest level of schooling                       |                                                        |                                                    |                                                                     |              |
| Primary school or lower                          | 100 (12.0)                                             | 0 (0.0)                                            | Reference                                                           |              |
| Secondary school or higher                       | 734 (88.0)                                             | 17 (100.0)                                         | 2.15 (0.48, 5.85)                                                   | 0.14         |
| Employment                                       |                                                        |                                                    |                                                                     |              |
| Employed                                         | 131 (15.7)                                             | 3 (17.6)                                           |                                                                     |              |
| Unemployed                                       | 703 (84.3)                                             | 14 (82.4)                                          | -                                                                   | -            |
| Occupants per household                          | 4 (3.6)                                                | 4 (1.6)                                            | 0.80 (0.51, 345.73)                                                 | 0.80         |
| Smoking history                                  |                                                        |                                                    |                                                                     |              |
| No                                               | 513 (61.5)                                             | 9 (52.9)                                           |                                                                     |              |
| Yes                                              | 321 (38.5)                                             | 8 (47.1)                                           | -                                                                   | -            |
| Prior TB                                         |                                                        |                                                    |                                                                     |              |
| No                                               | 630 (75.5)                                             | 13 (76.5)                                          |                                                                     |              |
| Yes                                              | 204 (24.5)                                             | 4 (23.5)                                           | -                                                                   | -            |
| TB household contacts                            |                                                        |                                                    |                                                                     |              |
| No                                               | 674 (80.8)                                             | 17 (100.0)                                         | Reference                                                           |              |
| Yes                                              | 160 (19.2)                                             | 0 (0.0)                                            | 0.36 (0.03, 1.13)                                                   | <b>0.035</b> |
| Isoniazid preventive therapy at enrolment        |                                                        |                                                    |                                                                     |              |
| Not on therapy                                   | 788 (94.5)                                             | 17 (100.0)                                         | Reference                                                           |              |
| On therapy                                       | 46 (5.5)                                               | 0 (0.0)                                            | 0.78 (0.25, 169.67)                                                 | 0.72         |
| Antiretroviral therapy at enrolment              |                                                        |                                                    |                                                                     |              |
| Naïve                                            | 183 (21.9)                                             | 7 (41.2)                                           | 1.21 (0.01, 2.04) †                                                 | 0.77         |
| <6 months                                        | 112 (13.4)                                             | 2 (11.8)                                           | -                                                                   | -            |
| ≥6 months                                        | 539 (64.6)                                             | 8 (47.1)                                           | -                                                                   | -            |
| Body-mass index (kg/m <sup>2</sup> )             | 24.3 (20.6-31.3)                                       | 21.3 (18.7-24.0)                                   | 0.57 (0.05, 7.42)                                                   | 0.29         |
| CD4-positive cell count (cells/mm <sup>3</sup> ) | 530.5 (354.2-731.0)                                    | 393.0 (248.0-591.0)                                | 0.54 (0.00, 1.16) *                                                 | <b>0.040</b> |
| HIV plasma viral load                            |                                                        |                                                    |                                                                     |              |
| <100 copies/mL                                   | 179 (45.1)                                             | 1 (9.1)                                            | #                                                                   | #            |
| ≥100 copies/mL                                   | 218 (54.9)                                             | 10 (90.9)                                          |                                                                     |              |
| Not tested (missing)                             | 437                                                    | 6                                                  |                                                                     |              |
| Season at enrolment                              |                                                        |                                                    |                                                                     |              |
| Spring                                           | 196 (23.5)                                             | 8 (47.1)                                           | 1.47 (1.23, >1000) †                                                | <b>0.014</b> |
| Summer                                           | 218 (26.1)                                             | 2 (11.8)                                           | 0.83 (0.69, >1000) †                                                | 0.98         |
| Autumn                                           | 188 (22.5)                                             | 3 (17.6)                                           | -                                                                   | -            |
| Winter                                           | 232 (27.8)                                             | 4 (23.5)                                           | -                                                                   | -            |
| TB symptoms at enrolment                         |                                                        |                                                    |                                                                     |              |
| No                                               | 789 (94.6)                                             | 15 (88.2)                                          | Reference                                                           |              |
| Yes                                              | 45 (5.4)                                               | 2 (11.8)                                           | 1.09 (0.00, 1.02)                                                   | 0.97         |
| IGRA status                                      |                                                        |                                                    |                                                                     |              |
| Negative                                         | 455 (54.6)                                             | 5 (29.4)                                           | Reference                                                           |              |
| Positive                                         | 379 (45.4)                                             | 12 (70.6)                                          | 1.76 (0.89, 60.02)                                                  | <b>0.038</b> |

IQR, interquartile range. CI, confidence interval. OR, odds ratio. aOR, adjusted OR. IGRA, interferon-γ release assay. TB, tuberculosis. NA, not applicable. \*Per 50 cells/mm<sup>3</sup>. #Excluded from LASSO analysis. †Reference group includes all other levels of variable.

**Supplementary Table 5: Regression analyses examining baseline factors associated with progression to incident TB disease within 15 months in people living with HIV (sensitivity analysis with site removed from LASSO regression)**

|                                                   | No incident TB,<br>n (%) or median<br>(IQR)<br><br>N=808 | Incident TB,<br>n (%) or median<br>(IQR)<br><br>N=21 | Multivariable Cox LASSO regression<br>with selective inference |              |
|---------------------------------------------------|----------------------------------------------------------|------------------------------------------------------|----------------------------------------------------------------|--------------|
|                                                   |                                                          |                                                      | aHR (95%CI)                                                    | p value      |
| Sex                                               |                                                          |                                                      |                                                                |              |
| Female                                            | 590 (73.0)                                               | 15 (71.4)                                            | Reference                                                      |              |
| Male                                              | 218 (27.0)                                               | 6 (28.6)                                             | 0.71 (0.75, >1000)                                             | 0.95         |
| Age                                               | 35 (29.42)                                               | 33 (30.40)                                           | 0.75 (0.03, 10.16)                                             | 0.36         |
| Ethnicity                                         |                                                          |                                                      |                                                                |              |
| Black African                                     | 689 (85.3)                                               | 11 (52.4)                                            | Reference                                                      |              |
| Mixed Ancestry                                    | 119 (14.7)                                               | 10 (47.6)                                            | 1.56 (1.22, 209.44)                                            | <b>0.004</b> |
| Site                                              |                                                          |                                                      |                                                                |              |
| Durban, KwaZulu-Natal                             | 281 (34.8)                                               | 6 (28.6)                                             |                                                                |              |
| Klerksdorp, North West                            | 158 (19.6)                                               | 1 (4.8)                                              | #                                                              | #            |
| Rustenburg, North West                            | 154 (19.1)                                               | 2 (9.5)                                              |                                                                |              |
| Ravensmead, Western Cape                          | 84 (10.4)                                                | 5 (23.8)                                             |                                                                |              |
| Worcester, Western Cape                           | 131 (16.2)                                               | 7 (33.3)                                             |                                                                |              |
| Highest level of schooling                        |                                                          |                                                      |                                                                |              |
| Primary school or lower                           | 95 (11.8)                                                | 5 (23.8)                                             | Reference                                                      |              |
| Secondary school or higher                        | 713 (88.2)                                               | 16 (76.2)                                            | 0.84 (0.60, 20.04)                                             | 0.73         |
| Employment                                        |                                                          |                                                      |                                                                |              |
| Employed                                          | 130 (16.1)                                               | 1 (4.8)                                              | Reference                                                      |              |
| Unemployed                                        | 678 (83.9)                                               | 20 (95.2)                                            | 1.78 (0.52, 3.49)                                              | 0.18         |
| Occupants per household                           | 4 (3.6)                                                  | 4 (3.8)                                              | 1.20 (0.07, 2.70)                                              | 0.64         |
| Smoking history                                   |                                                          |                                                      |                                                                |              |
| No                                                | 501 (62.0)                                               | 9 (42.9)                                             |                                                                |              |
| Yes                                               | 307 (38.0)                                               | 12 (57.1)                                            | NA                                                             | NA           |
| Prior TB                                          |                                                          |                                                      |                                                                |              |
| No                                                | 614 (76.0)                                               | 12 (57.1)                                            | Reference                                                      |              |
| Yes                                               | 194 (24.0)                                               | 9 (42.9)                                             | 1.75 (0.13, 2.44)                                              | 0.44         |
| TB household contacts                             |                                                          |                                                      |                                                                |              |
| No                                                | 654 (80.9)                                               | 16 (76.2)                                            |                                                                |              |
| Yes                                               | 154 (19.1)                                               | 5 (23.8)                                             | NA                                                             | NA           |
| Isoniazid preventive therapy during study conduct |                                                          |                                                      |                                                                |              |
| Did not receive therapy                           | 409 (50.6)                                               | 13 (61.9)                                            | Reference                                                      |              |
| Received therapy                                  | 399 (49.4)                                               | 8 (38.1)                                             | 0.72 (0.60, 224.52)                                            | 0.81         |
| Antiretroviral therapy (ART) during study conduct |                                                          |                                                      |                                                                |              |
| ART experienced                                   | 635 (78.6)                                               | 12 (57.1)                                            | -                                                              |              |
| ART naïve                                         | 42 (5.2)                                                 | 1 (4.8)                                              | -                                                              |              |
| ART started after enrolment                       | 131 (16.2)                                               | 8 (38.1)                                             | 1.55 (0.11, 2.08) †                                            | 0.52         |
| Body-mass index (kg/m <sup>2</sup> )              | 24.5 (20.7-31.5)                                         | 19.9 (18.5-24.9)                                     | 0.52 (0.39, >1000)                                             | 0.84         |
| CD4-positive cell count (cells/mm <sup>3</sup> )  | 533.5 (360.8-734.2)                                      | 291.0 (145.0-573.0)                                  | 0.44 (0.28, 12.54) *                                           | 0.39         |
| HIV plasma viral load                             |                                                          |                                                      |                                                                |              |
| <100 copies/mL                                    | 175 (46.1)                                               | 3 (20.0)                                             | #                                                              | #            |
| ≥100 copies/mL                                    | 205 (53.9)                                               | 12 (80.0)                                            |                                                                |              |
| Not tested (missing)                              | 428                                                      | 6                                                    |                                                                |              |
| Season at enrolment                               |                                                          |                                                      |                                                                |              |
| Spring                                            | 190 (23.5)                                               | 6 (28.6)                                             | -                                                              | -            |
| Summer                                            | 210 (26.0)                                               | 5 (23.8)                                             | -                                                              | -            |
| Autumn                                            | 187 (23.1)                                               | 1 (4.8)                                              | 0.44 (0.24, 1.40) †                                            | 0.089        |
| Winter                                            | 221 (27.4)                                               | 9 (42.9)                                             | -                                                              | -            |
| TB symptoms at enrolment                          |                                                          |                                                      |                                                                |              |
| No                                                | 764 (94.6)                                               | 20 (95.2)                                            |                                                                |              |
| Yes                                               | 44 (5.4)                                                 | 1 (4.8)                                              | -                                                              | -            |
| IGRA status                                       |                                                          |                                                      |                                                                |              |
| Negative                                          | 446 (55.2)                                               | 7 (33.3)                                             | Reference                                                      |              |
| Positive                                          | 362 (44.8)                                               | 14 (66.7)                                            | 1.51 (0.03, 2.13)                                              | 0.64         |

IQR, interquartile range. CI, confidence interval. HR, hazard ratio. aHR, adjusted hazard ratio. IGRA, interferon- $\gamma$  release assay. TB, tuberculosis. \*Per 50 cells/mm<sup>3</sup>. #Excluded from LASSO analysis. †Reference group includes all other levels of variable.

**Supplementary Table 6: Regression analyses examining factors associated with cumulative prevalent and incident TB disease in people living with HIV**

|                                                  | No prevalent or incident TB, n (%) or median (IQR)<br>N=813 | Cumulative prevalent & incident TB, n (%) or median (IQR)<br>N=38 | Univariable logistic regression |         | Multivariable binomial LASSO regression with selective inference |         |
|--------------------------------------------------|-------------------------------------------------------------|-------------------------------------------------------------------|---------------------------------|---------|------------------------------------------------------------------|---------|
|                                                  |                                                             |                                                                   | OR (95%CI)                      | p value | aOR (95%CI)                                                      | p value |
| Sex                                              |                                                             |                                                                   |                                 |         |                                                                  |         |
| Female                                           | 593 (72.9)                                                  | 24 (63.2)                                                         | Reference                       |         |                                                                  |         |
| Male                                             | 220 (27.1)                                                  | 14 (36.8)                                                         | 1.57 (0.78, 3.06)               | 0.19    | -                                                                | -       |
| Age                                              | 35.0 (29.0-42.0)                                            | 34.0 (31.0-41.5)                                                  | 1.00 (0.96, 1.04)               | 0.96    | -                                                                | -       |
| Ethnicity                                        |                                                             |                                                                   |                                 |         |                                                                  |         |
| Black African                                    | 693 (85.2)                                                  | 23 (60.5)                                                         | Reference                       |         | Reference                                                        |         |
| Mixed Ancestry                                   | 120 (14.8)                                                  | 15 (39.5)                                                         | 3.77 (1.88, 7.36)               | <0.001  | 1.25 (0.05, 5.80)                                                | 0.58    |
| Site                                             |                                                             |                                                                   |                                 |         |                                                                  |         |
| Durban, KwaZulu-Natal                            | 282 (34.7)                                                  | 13 (34.2)                                                         | Reference                       |         | 1.43 (0.00, 32.88)<br>†                                          |         |
| Klerksdorp, North West                           | 159 (19.6)                                                  | 1 (2.6)                                                           | 0.14 (0.01, 0.69)               | <0.001‡ | 0.62 (0.00, 14.10)<br>†                                          | 0.65    |
| Rustenburg, North West                           | 156 (19.2)                                                  | 2 (5.3)                                                           | 0.28 (0.04, 1.02)               | 0.056   | †                                                                | 0.23    |
| Ravensmead, Western Cape                         | 84 (10.3)                                                   | 5 (13.2)                                                          | 1.29 (0.40, 3.53)               | 0.095   | -                                                                | 0.40    |
| Worcester, Western Cape                          | 132 (16.2)                                                  | 17 (44.7)                                                         | 2.79 (1.32, 6.03)               | 0.007   | 1.75 (0.03, 11.03)<br>†                                          | -       |
| Highest level of schooling                       |                                                             |                                                                   |                                 |         |                                                                  |         |
| Primary school or lower                          | 95 (11.7)                                                   | 5 (13.2)                                                          | Reference                       |         | -                                                                | -       |
| Secondary school or higher                       | 718 (88.3)                                                  | 33 (86.8)                                                         | 0.87 (0.36, 2.60)               | 0.78    | -                                                                | -       |
| Employment                                       |                                                             |                                                                   |                                 |         |                                                                  |         |
| Employed                                         | 130 (16.0)                                                  | 4 (10.5)                                                          | Reference                       |         | Reference                                                        |         |
| Unemployed                                       | 683 (84.0)                                                  | 34 (89.5)                                                         | 1.62 (0.63, 5.49)               | 0.37    | 1.28 (0.29, 1.75)                                                | 0.50    |
| Occupants per household                          | 4.0 (3.0-6.0)                                               | 4.0 (3.0-6.0)                                                     | 1.01 (0.90, 1.12)               | 0.82    | -                                                                | -       |
| Smoking history                                  |                                                             |                                                                   |                                 |         |                                                                  |         |
| No                                               | 504 (62.0)                                                  | 18 (47.4)                                                         | Reference                       |         |                                                                  |         |
| Yes                                              | 309 (38.0)                                                  | 20 (52.6)                                                         | 1.81 (0.94, 3.51)               | 0.074   | -                                                                | -       |
| Prior TB                                         |                                                             |                                                                   |                                 |         |                                                                  |         |
| No                                               | 618 (76.0)                                                  | 25 (65.8)                                                         | Reference                       |         | Reference                                                        |         |
| Yes                                              | 195 (24.0)                                                  | 13 (34.2)                                                         | 1.65 (0.80, 3.23)               | 0.16    | 1.17 (0.04, 1.52)                                                | 0.77    |
| TB household contacts                            |                                                             |                                                                   |                                 |         |                                                                  |         |
| No                                               | 658 (80.9)                                                  | 33 (86.8)                                                         | Reference                       |         |                                                                  |         |
| Yes                                              | 155 (19.1)                                                  | 5 (13.2)                                                          | 0.64 (0.22, 1.53)               | 0.37    | -                                                                | -       |
| Isoniazid preventive therapy at enrolment        |                                                             |                                                                   |                                 |         |                                                                  |         |
| Not on therapy                                   | 767 (94.3)                                                  | 38 (100.0)                                                        | NA                              | NA      | Reference                                                        |         |
| On therapy                                       | 46 (5.7)                                                    | 0 (0.0)                                                           |                                 |         | 0.76 (0.50, 12.73)                                               | 0.63    |
| Antiretroviral therapy at enrolment              |                                                             |                                                                   |                                 |         |                                                                  |         |
| Naïve                                            | 174 (21.4)                                                  | 16 (42.1)                                                         | Reference                       |         | 1.22 (0.55, 3.20) <sup>†</sup>                                   | 0.27    |
| <6 months                                        | 110 (13.5)                                                  | 4 (10.5)                                                          | 0.40 (0.11, 1.11)               | 0.10    | -                                                                | -       |
| ≥6 months                                        | 529 (65.1)                                                  | 18 (47.4)                                                         | 0.37 (0.18, 0.75)               | 0.005   | -                                                                | -       |
| Body-mass index (kg/m <sup>2</sup> )             | 24.5 (20.7-31.4)                                            | 21.0 (18.6-24.7)                                                  | 0.89 (0.83, 0.95)               | <0.001  | 0.47 (0.28, 0.78)                                                | 0.003   |
| CD4-positive cell count (cells/mm <sup>3</sup> ) | 533.0 (360.0-733.0)                                         | 357.5 (158.8-588.0)                                               | 0.88 (0.81, 0.94) <sup>*</sup>  | <0.001  | 0.51 (0.34, 0.81)                                                | 0.004   |
| HIV plasma viral load                            |                                                             |                                                                   |                                 |         |                                                                  |         |
| <100 copies/mL                                   | 176 (46.1)                                                  | 4 (15.4)                                                          | Reference                       |         | #                                                                | #       |
| ≥100 copies/mL                                   | 206 (53.9)                                                  | 22 (84.6)                                                         | 4.7 (1.76, 16.3)                | 0.005   |                                                                  |         |
| Not tested (missing)                             | 431                                                         | 12                                                                | NA                              | NA      |                                                                  |         |
| Season at enrolment                              |                                                             |                                                                   |                                 |         |                                                                  |         |
| Spring                                           | 190 (23.4)                                                  | 14 (36.8)                                                         | Reference                       |         | 1.09 (0.02, 1.40) <sup>†</sup>                                   | 0.85    |
| Summer                                           | 213 (26.2)                                                  | 7 (18.4)                                                          | 0.45 (0.17, 1.10)               | 0.088   | -                                                                | -       |
| Autumn                                           | 187 (23.0)                                                  | 4 (10.5)                                                          | 0.29 (0.08, 0.83)               | 0.032   | 0.75 (0.16, 2.14) <sup>†</sup>                                   | 0.23    |
| Winter                                           | 223 (27.4)                                                  | 13 (34.2)                                                         | 0.79 (0.36, 1.73)               | 0.56    | -                                                                | -       |
| TB symptoms at enrolment                         |                                                             |                                                                   |                                 |         |                                                                  |         |
| No                                               | 769 (94.6)                                                  | 35 (92.1)                                                         | Reference                       |         |                                                                  |         |
| Yes                                              | 44 (5.4)                                                    | 3 (7.9)                                                           | 1.50 (0.35, 4.38)               | 0.52    | -                                                                | -       |
| IGRA status                                      |                                                             |                                                                   |                                 |         |                                                                  |         |
| Negative                                         | 448 (55.1)                                                  | 12 (31.6)                                                         | Reference                       |         | Reference                                                        |         |
| Positive                                         | 365 (44.9)                                                  | 26 (68.4)                                                         | 2.66 (1.35, 5.53)               | 0.006   | 1.58 (1.01, 2.59)                                                | 0.023   |

IQR, interquartile range. CI, confidence interval. OR, odds ratio. aOR, adjusted OR. IGRA, interferon- $\gamma$  release assay. TB, tuberculosis. NA, not applicable. <sup>\*</sup>Per 50 cells/mm<sup>3</sup>. <sup>#</sup>Excluded from LASSO analysis. <sup>†</sup>Reference group includes all other levels of variable. <sup>‡</sup>Likelihood-ratio test for significance of categorical variable.

## References

1. Dorai-Raj S. binom: Binomial Confidence Intervals For Several Parameterizations. R package version 1.1-1. 2014. <https://CRAN.R-project.org/package=binom> (accessed October 01, 2021).
2. Aalen O. Nonparametric Inference for a Family of Counting Processes. *Annals of Statistics*. 1978; **6**(4): 701-26. doi: DOI 10.1214/aos/1176344247.
3. Friedman J, Hastie T, Tibshirani R, et al. Lasso and Elastic-Net Regularized Generalized Linear Models (Version 4.1-2). 2021. <https://cran.r-project.org/web/packages/glmnet/glmnet.pdf> (accessed July 22, 2021).
4. Breiman L, Spector P. Submodel Selection and Evaluation in Regression - the X-Random Case. *International Statistical Review*. 1992; **60**(3): 291-319. doi: Doi 10.2307/1403680.
5. Baik Y, Rickman HM, Hanrahan CF, et al. A clinical score for identifying active tuberculosis while awaiting microbiological results: Development and validation of a multivariable prediction model in sub-Saharan Africa. *PLoS Med*. 2020; **17**(11): e1003420. doi: 10.1371/journal.pmed.1003420.
6. Hanifa Y, Fielding KL, Chihota VN, et al. A clinical scoring system to prioritise investigation for tuberculosis among adults attending HIV clinics in South Africa. *PLoS ONE*. 2017; **12**(8): e0181519. doi: 10.1371/journal.pone.0181519.
7. Gupta RK, Calderwood CJ, Yavlinsky A, et al. Discovery and validation of a personalized risk predictor for incident tuberculosis in low transmission settings. *Nat Med*. 2020; **26**(12): 1941-9. doi: 10.1038/s41591-020-1076-0.
8. Robin X, Turck N, Hainard A, et al. pROC: an open-source package for R and S+ to analyze and compare ROC curves. *BMC Bioinformatics*. 2011; **12**: 77. doi: 10.1186/1471-2105-12-77.
9. DeLong ER, DeLong DM, Clarke-Pearson DL. Comparing the areas under two or more correlated receiver operating characteristic curves: a nonparametric approach. *Biometrics*. 1988; **44**(3): 837-45. doi: 10.2307/2531595.
10. Carpenter J, Bithell J. Bootstrap confidence intervals: when, which, what? A practical guide for medical statisticians. *Stat Med*. 2000; **19**(9): 1141-64. doi: 10.1002/(sici)1097-0258(20000515)19:9<1141::Aid-sim479>3.0.Co;2-f.
11. WHO. High-priority target product profiles for new tuberculosis diagnostics: report of a consensus meeting. Geneva: World Health Organization. 2014. <https://apps.who.int/iris/handle/10665/135617> (accessed May 22, 2020).
12. WHO. Consensus Meeting Report: Development of a Target Product Profile (TPP) and a framework for evaluation for a test for predicting progression from tuberculosis infection to active disease. Geneva: World Health Organization. 2017. <http://apps.who.int/iris/handle/10665/259176> (accessed May 22, 2020).
